1    Socially regulated estrogen in an eavesdropping brood parasite

2    Kathleen S. Lynch\*, Gulnoza Azieva, Anthony Pellicano

3    Corresponding Author: Kathleen S. Lynch, [Kathleen.Lynch@hofstra.edu](mailto:Kathleen.Lynch@hofstra.edu); 325 Gittleson Hall,  
4    Hofstra University Hempstead, NY 11549

5    Gulnoza Azieva: Hofstra University Hempstead NY 11549

6    Anthony Pellicano: Hofstra University Hempstead NY 11549

7

8    Key words: Brown-headed cowbird (*Molothrus ater*), social regulation, estrogen, hypothalamic-  
9    pituitary-gonadal axis (HPG)

10   Tables: 0

11   Figures: 1

12   Declaration of interests: None

13

14

15

16

17

18

19

20

21

22

23

24

25

26

27

28

29

30

31

32 **Abstract**

33 Social regulation of reproductive hormones is a means by which conspecific males and  
34 females orchestrate successful reproductive efforts. There is variation, however, in the range of  
35 social cues that will initiate a hormone response in the receiver of social signals. We investigate  
36 whether social cues modify activity within the hypothalamic-pituitary-gonadal (HPG) axis and the  
37 specificity of this response in a social parasite that is known to eavesdrop on the communication  
38 signals of other species: the brown-headed cowbird (*Molothrus ater*). Brown-headed cowbirds  
39 are obligate brood parasites that do not build nests or care for their own young. Instead, obligate  
40 brood parasites always leave their eggs in the nest of a host species thereby receiving the  
41 benefits of parental care toward offspring without paying any of the costs. Thus, social parasites  
42 must coordinate their breeding attempts with conspecifics as well as potential heterospecific  
43 hosts and therefore, social parasites such as cowbirds rely on the communication signals of  
44 host species to help locate nests to parasitize during the breeding season. Here, we explore  
45 whether the vocal signals of potential host species can also be used as a social cue that  
46 modifies the HPG axis of female brown-headed cowbirds. Results reveal that both conspecific  
47 and heterospecific song-exposed females exhibit significantly greater circulating estradiol  
48 concentrations as compared to silence-exposed females. While conspecific song induces the  
49 greatest elevation in circulating estradiol, there is no significant difference in circulating estradiol  
50 levels in females exposed to either conspecific or heterospecific songs. This pattern suggests  
51 both song types are effective at evoking a reproductive physiological response. On the other  
52 hand, circulating progesterone concentrations did not differ among the song- and silence-  
53 exposed groups nor did the size of the female's ovarian follicles. These results indicate that  
54 heterospecific vocal communication signals can effectively be used as a social cue that  
55 simultaneously provides necessary information regarding breeding status of hosts and modifies  
56 breeding condition of the eavesdropper.

57

58

59 **Highlights**

- 60 • Brood parasites may coordinate reproductive attempts with potential hosts.
- 61 • Therefore, parasites eavesdrop on other species, which helps them find nests.
- 62 • Vocal signals from conspecific and heterospecifics elevate estrogen in parasites.
- 63 • Hearing potential host songs may enhance reproductive hormones in brood parasites.

64

65

66

67

68

69

70

71

72

73

74

75

76

77

78

79

80

81

82

## 83 **1.0 Introduction**

84 Reproductive physiology and behavior can be regulated, in part, by social environment  
85 (Lehrman, 1965). Social regulation of reproductive physiology helps coordinate reproductive  
86 attempts between males and females that are attending to the social cues of their partners.  
87 There is variation, however, in the specificity of social signals that modify the receiver's  
88 physiology. Reception of one's own signals and/or reception of conspecific signals modify  
89 physiological states of the receiver, help coordinate complex social behaviors, and guide  
90 context-appropriate responses (Cheng, 1992; Cheng et al, 1998; Lynch and Wilczynski, 2006;  
91 Watts et al, 2016; Roleira et al, 2017). Here, we pair the phenomenon of social-dependent  
92 regulation of reproductive physiology with animal behavior studies demonstrating that some  
93 species intentionally and routinely eavesdrop on communication signals not intended for them.  
94 These species actively seek out signals for which they were not the intended target (i.e.  
95 eavesdropping) to obtain vital information that may enhance not just reproduction but also  
96 predation and parasitism opportunities, thereby increasing the eavesdropper's fitness (Zuk and  
97 Kolluru, 1998; Bernal et al, 2006; 2007; Page and Ryan, 2008).

98 Social parasites that must locate hosts for reproductive purposes eavesdrop on the  
99 communication of heterospecifics. One example of a social parasite that eavesdrops is the  
100 brown-headed cowbird (*Molothrus ater*), an obligate brood parasite. Avian obligate brood  
101 parasites do not build nests, incubate eggs or provision their own young. Instead, the female  
102 parasite locates nests of other species that can serve as a host parent to her offspring. One of  
103 the ways in which breeding female parasites locate nests is through cryptic observation of hosts  
104 and their activities as well as attending to their vocalizations (Hann 1941; Gochfeld 1979;  
105 Clotfelter, 1998; Wiley, 1988; Alvarez 1993; Monk and Brush 2007; Janecka and Brush, 2014).  
106 This is termed the host-activity hypothesis, which predicts that brood parasites will be attracted  
107 to the vocalizations of potential hosts as well as their nest building behavior (Hann 1941;  
108 Gochfeld 1979; Wiley and Wiley 1980). Thus, conspicuous host vocalizations and other  
109 behaviors may be an important determinant of whether a host nest will be parasitized by  
110 eavesdropping brood parasites. Consequently, brood parasites should attend relevant social  
111 signals of conspecific and heterospecific species because the brood parasite must coordinate  
112 its reproductive behavior with both conspecific mates as well as possible heterospecific hosts.

113 The brown-headed cowbird (hereafter, cowbird) are oscine Passeriformes within the  
114 Icteridae family (i.e. blackbirds). Male cowbirds housed with females displayed peak circulating  
115 testosterone levels and mature gonads for longer as compared to cowbirds house without  
116 females (Dufty and Wingfield, 1990), indicating social regulation of reproductive physiology does  
117 occur in this species. Also, brown-headed cowbirds are known to eavesdrop on the activity of  
118 heterospecific hosts during the breeding season to aid in host nest location (Clotfelter, 1998).  
119 Here, we test the hypothesis that female cowbirds may coordinate their reproductive physiology  
120 with that of their hosts using social cues. We predict that heterospecific and conspecific  
121 vocalizations are both effective at modifying the reproductive physiology of female cowbirds. If  
122 this is the case, reproductive hormones and/or follicles will be significantly greater in conspecific  
123 and heterospecific song-exposed females as compared to silence-exposed females. These  
124 results will provide insight into whether brood parasites use heterospecific vocal signals as a  
125 means of coordinating timing of reproductive events and the specificity in the types of signals  
126 that will evoke a physiological response in these birds.

127

## 128 **2.0 Methods**

### 129 **2.1 Housing and stimulus exposure**

130 Female cowbirds (N = 18) were collected using bait traps in Travis and Kerr counties in  
131 Texas in May, 2016. Birds were transported to outdoor aviaries in Hempstead, NY and housed  
132 in semi-natural conditions. Females were fed a modified Bronx zoo diet with mealworm

133 supplements and were isolated from male brown-head cowbirds to ensure no social interaction  
134 with males or male song during this time. In August, females showed no continued signs of  
135 breeding behavior. They were then housed in an indoor aviary to habituate for one week on a  
136 16L:8D light schedule. Females were visually isolated from each other while individually housed  
137 in 610 mm x 610 mm cages randomly placed in indoor aviaries with varied social conditions:  
138 conspecific song exposure (N = 7), heterospecific song exposure (N = 7) or silence (N = 4). This  
139 design, including the sample sizes in each group, followed the design described in Bentley et al,  
140 (2000). All procedures presented here were permitted by Hofstra IACUC.

141 Red-winged blackbird (*Agelaius phoeniceus*) songs were chosen as the heterospecific  
142 stimulus in this study because they are a common host and geographically sympatric species  
143 for the brown-headed cowbird (Lowther, 1993). Red-winged blackbirds are frequently targeted  
144 as a host species for the brown-head cowbird and may even be the preferred species in some  
145 regions of the cowbirds range. Red-winged blackbirds have a similar breeding initiation  
146 timeframe as the cowbird, a lower nest abandonment rate and mite parasitism compared to  
147 other blackbirds (Freeman et al, 1990; Ortega and Cruz, 1988; 1990), all of which may result in  
148 the red-winged blackbird being a preferred host in some parts of North America. Furthermore,  
149 cowbirds are frequently found in mixed flocks that contain red-winged blackbirds. These  
150 observations indicate that red-winged blackbirds are likely to be encountered at some point in  
151 the cowbirds lifetime; either during developmental or adult stages. Stimuli were designed as  
152 described in Lynch et al., 2017. Briefly, five independent examples of song were recorded from  
153 different male brown-headed cowbirds (fig. 1a for representative sonogram) or red-winged  
154 blackbirds. Each sound was filtered above 2000 HZ and below 500 HZ, and all sounds were  
155 normalized to the mean amplitude. To equilibrate the amount of stimulation between  
156 experimental and control stimuli, we matched peak amplitude and duration of signals as  
157 described in Lynch et al, 2017. Vocalizations were synthesized with 20 s of vocal stimulus / min  
158 and arranged so that 1-2 songs from each male recorded was presented in each minute of  
159 presentation. The amplitude of song at each cage ranged between 65 and 70 dB as measured  
160 by SPL meter 0.5 m from the speaker. Songs were broadcasted for 8 hours / day starting at  
161 6:00 a.m. followed by 16 hours of silence. Stimulus exposure in each condition continued for  
162 fourteen days during which time females continued to be fed the modified Bronx zoo diet with  
163 constant water supply. After fourteen days of song or silence exposure, females were sacrificed  
164 via rapid decapitation to collect blood tissue. As in Lynch et al (2017) and Bentley et al (2000),  
165 gonads were measured using calipers. The largest follicle was recorded in females across the  
166 three social exposure treatment groups.

## 167 168 **2.2 Hormone assays**

169 Immediately after collection, blood was centrifuged for 10min at 10,000rpm. Plasma was  
170 stored at -80°C until assayed. Circulating estradiol and progesterone concentrations were  
171 measured using modified extraction and assay procedures described in Lynch and Wilczynski,  
172 2005; 2006; 2008. Briefly, steroids were extracted from the plasma using 3 ml of diethyl ether.  
173 Samples in all treatment groups were simultaneously extracted. In addition, a pooled sample of  
174 plasma was stripped of steroid using charcoal-dextran and spiked with a known concentration of  
175 estradiol (250 pg/ml) and measured in the EIA assay to estimate extraction efficiencies. The  
176 averaged extraction efficiency was calculated at 72%. Extracted steroids resuspended in assay  
177 buffer were used to measure estradiol and progesterone concentrations using ELISA assay kits  
178 from Cayman chemical (Ann Arbor, Michigan). To validate these kits for use with cowbird  
179 plasma, we extracted estradiol and progesterone from a plasma sample and serially diluted it at  
180 three concentrations. We compared the slope of the line for the serially diluted samples and the  
181 slope of the line for the area of the curve necessary to estimate the concentration of the diluted  
182 samples as described in Lynch and Wilczynski, 2006. The slope of the line for the serially  
183 diluted estradiol samples was -25.1, and the slope of the line for the area of the estradiol

184 standard curve in which the samples are estimated was  $-27.9$ . The slope of the line for serially  
185 diluted progesterone samples was  $-811$  and the slope of the line for the area of the  
186 progesterone standard curve in which samples are estimated was  $-792$ . Both steroids were  
187 measured on a single plate, precluding an inter-assay variation measurement. One subject was  
188 removed in the heterospecific group and two were removed from the conspecific group due to  
189 high CV estimates for the triplicates (final heterospecific  $N = 6$ ; final conspecific  $N = 5$ ). After  
190 removal of these two elevated CV samples, the intra-assay variation was  $9.08\%$  and  $9.87\%$  for  
191 estradiol and progesterone respectively. According to the manufacturer, estradiol EIA kits have  
192 a  $0.1\%$  cross reactivity with testosterone and  $5\ \alpha$ -DHT,  $0.07\%$  for  $17\ \alpha$ -estradiol, and  $0.03\%$  for  
193 progesterone and the detection limit is  $6.6\ \text{pg/ml}$ . The progesterone assay has a detection limit  
194 of  $7.8\ \text{pg/ml}$  and the following cross reactivities: pregnenolone  $14\%$ ,  $17\beta$ -estradiol  $7.2\%$ ,  $5\beta$ -  
195 pregnan- $3\alpha$ -ol- $20$ -one  $6.7\%$ , and  $17\alpha$ -hydroxyprogesterone  $3.6\%$ . All other reported cross  
196 reactivities were less than  $0.5\%$ .

197

### 198 **2.3 Statistics**

199 Circulating estradiol and progesterone concentrations as well as follicle sizes were  
200 compared separately across three groups of females exposed to different social cues using  
201 non-parametric tests due to unequal variances. Separate Kruskal-Wallis tests determined  
202 whether there were any significant differences in circulating estradiol or progesterone  
203 concentrations across the three social exposure groups: conspecific and heterospecific song  
204 exposure as well as silence exposure. Post hoc pairwise comparisons were conducted using  
205 independent t-tests. Due to heteroscedasticity, pairwise tests were corrected for unequal  
206 variances. Benjamini-Hochberg corrections were used to adjust the false discovery rate for  
207 multiple tests as both conspecific and heterospecific groups were compared to silence. This  
208 adjusted the heterospecific and conspecific comparison to silence to an alpha value of  $0.025$   
209 and  $0.05$  respectively.

210

### 211 **3.0 Results**

212 A significant difference in circulating estradiol concentration across the three treatment  
213 groups was detected ( $H = 6.38$ ;  $df = 2$ ;  $P = 0.041$ ). Post-hoc pairwise comparisons reveal that  
214 conspecific and heterospecific song exposed females had significantly higher circulating  
215 estradiol concentrations as compared to silence ( $t_4 = 2.83$ ,  $P = 0.047$ ;  $t_7 = 2.37$ ,  $P = 0.022$   
216 respectively; fig. 1a). There was no difference in circulating estradiol concentrations between  
217 heterospecific and conspecific song exposed females ( $t_4 = -2.27$ ,  $P = 0.08$ ). On the other hand,  
218 no significant difference in circulating progesterone concentration across the three treatment  
219 groups was detected ( $H = 1.1$ ;  $df = 2$ ;  $P = 0.57$ ; fig. 1b). Likewise, no significant difference was  
220 detected in largest follicle size ( $H = 2.23$ ;  $df = 2$ ;  $P = 0.32$ ; fig. 1c).

221

### 222 **4.0 Discussion**

223 Social signals, including vocalizations, are sufficient to initiate activity within the  
224 hypothalamic-pituitary-gonadal (HPG) axis of birds (Bentley et al., 2000; Friedman, 1977;  
225 Kroodsma, 1976; Waas et al., 2005; Brockway, 1964; Haase et al., 1976). There is variation  
226 across species, however, in the specificity of social signals that will initiate this response  
227 (Bentley et al., 2000). In the present study, we apply this well-established phenomenon to the  
228 brown-headed cowbird, a species that eavesdrops on a wide array of heterospecific social  
229 signals to enhance its own fitness.

230 The results demonstrate that females exposed to either heterospecific or conspecific  
231 vocalizations displayed elevated circulating estradiol but not progesterone concentrations in  
232 comparison to females exposed to silence. These results indicate that both heterospecific and  
233 conspecific vocalizations will initiate a response in estradiol, but not progesterone, production in  
234 female cowbirds. Estradiol regulates a range of necessary processes in female songbirds during

235 reproduction including modifying sensory processing that may enhance detection of male  
236 signals (Maney and Pinaud, 2011; Caras et al, 2012), inducing receptive responses to male  
237 courtship signals (Searcy and Capp, 1997; Leboucher et al, 1998) and, altering activity of  
238 catecholamines that also play a role in reproduction and mating (Matragrano et al, 2001;  
239 Rodríguez-Saltos et al, 2018; see Lynch, 2017 for review). Progesterone, on the other hand,  
240 has been demonstrated to inhibit reproductive behavior in some female songbirds (Leboucher et  
241 al, 2000). Thus, social regulation of circulating estradiol concentration by heterospecific and  
242 conspecific social signals may occur because both signals provide meaningful information  
243 regarding the commencement or conclusion of breeding season and allows brood parasitic birds  
244 to coordinate their reproductive efforts with each other as well as with their heterospecific hosts.

245 While circulating estradiol concentrations were significantly elevated by social exposure  
246 in female cowbirds, results indicate that development of ovarian follicles was unaffected by  
247 conspecific and heterospecific song exposure. There was no difference in measurements of  
248 either the largest follicle or the total size of the follicular cluster across any of the vocal exposure  
249 groups and silence. This result is consistent with studies from other songbirds, particularly pine  
250 siskins (*Spinus pinus*), European starlings (*Sternus vulgaris*), willow tits (*Parus montanus*) and  
251 white crowned sparrows (*Zonotrichia leucophrys pugetensis*). In these studies, females  
252 exhibited advanced gonadal development in the presence of a male, which appeared to be a  
253 vital cue instigating the progression to yolk deposition and follicular maturation (Perfito et al,  
254 2014, Watts et al 2015; Wingfield et al., 1997). Therefore, it is possible that female cowbirds  
255 exposed to conspecific and heterospecific songs do not progress to advanced stages of  
256 follicular maturation because neither vocal signal is sufficient to initiate this process. As it is also  
257 the case that follicular development in song-exposed females is not different from females  
258 exposed to 14d of silence, it is possible that physical or visual interaction with males is  
259 necessary for advancing to mature follicular stages. This supports the hypothesis that vocal  
260 cues may be sufficient to instigate reproductive steroid production but final stages of follicle  
261 development require actual interaction with males (Watts et al 2015), suggesting that at least a  
262 visual cue from males are needed for the final stages of reproductive readiness to be achieved.

263 The results of this study reflect behavioral studies demonstrating that heterospecific  
264 songs provide meaningful information to brood parasites. For instance, in bronzed cowbirds  
265 (*Molothrus aeneus*), broadcasted songs of Audubon's orioles are visited at nearly equal rates by  
266 orioles and bronzed cowbirds. Because orioles are a preferred host species for bronzed  
267 cowbirds this suggests that social cues used by orioles are a potent signal that attracts the  
268 attention of the cowbird (Monk and Brush, 2007). In a related study, bronzed cowbirds  
269 responded in greater numbers to the songs of orioles species (their preferred hosts) than to the  
270 songs of olive sparrows (*Arremonops rufivirgatus*), a lower-quality host species (Janecka and  
271 Brush, 2014). Further evidence indicates that female cowbirds use heterospecific songs as a  
272 cue during nest searching (Clotfelter, 1998; Janecka and Brush, 2014) and individual female  
273 cowbirds exhibit flexible preferences for a few specific host species (Strausberger and Ashley,  
274 2005), which suggests memory for heterospecific signals. Thus, songs may help the brood  
275 parasite locate host nests and serve as a cue to help them find breeding heterospecifics that  
276 may soon build a nest. The results presented in our study suggest that signals from other  
277 species not only aid the brood parasite in locating host nests in which to lay eggs but also  
278 modulate the cowbirds reproductive hormones. Therefore, by attending to heterospecific signals  
279 the cowbird accomplishes two important tasks: it gains information regarding the possible  
280 location of nests while simultaneously coordinating its reproductive timing with that of its host  
281 species.

282 Social regulation of reproductive physiology via heterospecific signals has occurred in  
283 other species albeit not to the extent that conspecific signals evoke the response. For instance,  
284 in captive canaries, conspecific song exposure induced marginally significantly greater follicle  
285 sizes as compared to heterospecific song exposure but both social exposure groups exhibited

286 significantly greater follicular sizes in relation to silence-exposed females (Bentley et al., 2000).  
287 However, when time to lay eggs was measured, conspecific song-exposed females displayed  
288 significantly shorter time to lay eggs and laid more of them in relation to heterospecific song-  
289 exposed females. Taken together, these experiments reveal conspecific song-exposed female  
290 exhibited the greatest responses in ovarian development however, heterospecific song  
291 exposure induced a greater response in comparison silence exposure in these measures. This  
292 suggests that even in a captive population of canaries, heterospecific songs possess some  
293 ecological relevance, albeit less than conspecific songs. This result implies that, to some  
294 degree, all birds attend to communication signals not intended for them and that these signals  
295 possess ecological relevance as they may inform the receiver of major transitions within the  
296 avian community regarding the breeding or non-breeding status of the members of the  
297 community.

298 From an evolutionary perspective, physiological responses to song are likely subjected  
299 to less selection pressure for discrimination than the female's behavioral response. Thus, a  
300 broader range of signals should evoke activity within the HPG axis while only a subset of the  
301 most relevant signals should evoke a behavioral response from a female. By broadening the  
302 definition of signals that can evoke physiological responses, animals can orchestrate  
303 reproductive efforts across multiple biological levels including between individuals, populations  
304 and communities. Consequently, less attractive conspecific signals and even heterospecific  
305 signals may evoke physiological responses in reproductive systems in eavesdropping animals  
306 and possibly in wide array of free-living animals.

307  
308 Acknowledgments: We thank Texas EcoLabs and Balcones Wildlife Refuge for support with  
309 field collections of cowbirds and financial support of this study. We also thank Mary Ramsey for  
310 comments on earlier versions of this manuscript.

311  
312  
313  
314  
315  
316  
317  
318  
319  
320  
321  
322  
323  
324  
325  
326  
327  
328  
329  
330  
331  
332  
333  
334  
335  
336

337  
338  
339  
340  
341  
342  
343  
344  
345  
346  
347  
348  
349  
350  
351  
352  
353  
354  
355  
356  
357  
358  
359  
360  
361  
362  
363  
364  
365  
366  
367  
368  
369  
370  
371  
372  
  
373  
  
374  
  
375  
  
376  
  
377  
  
378  
  
379  
  
380

## Figure Legends

Figure 1. Results of hormone assays after female brown-headed cowbirds (*Molothrus ater*) were exposed to fourteen consecutive days of silence, conspecific or heterospecific songs. (a) Results comparing circulating estradiol assays, (b) Results comparing circulating progesterone assays and, (c) Results comparing female's largest follicle. All error bars represent S.E.M.



- 381  
382  
383  
384 Alvarez, F., 1993. Proximity of trees facilitates parasitism by Cuckoos (*Cuculus canorus*) on  
385 Rufous Warblers (*Cercotrichas galactotes*). *Ibis* 135, 331–331.  
386 <https://doi.org/10.1111/j.1474-919X.1993.tb02853.x>
- 387 Bernal, X.E., Page, R.A., Rand, A.S., Ryan, M.J., 2007. Cues for eavesdroppers: do frog calls  
388 indicate prey density and quality? *Am. Nat.* 169, 409–415.  
389 <https://doi.org/10.1086/510729>
- 390 Brockway, B.F., 1964. Social influences on reproductive physiology and ethology of budgerigars  
391 (*Melopsittacus undulatus*). *Anim. Behav.* 12, 493–501. [https://doi.org/10.1016/0003-](https://doi.org/10.1016/0003-3472(64)90070-3)  
392 [3472\(64\)90070-3](https://doi.org/10.1016/0003-3472(64)90070-3)
- 393 Brzoska, J., Obert, H.J., 1980. Acoustic signals influencing the hormone production of the testes  
394 in the grass frog. *J. Comp. Physiol.* 140, 25–29. <https://doi.org/10.1007/BF00613744>
- 395 Burmeister, S., Wilczynski, W., 2000. Social signals influence hormones independently of calling  
396 behavior in the Treefrog (*Hyla cinerea*). *Horm. Behav.* 38, 201–209.  
397 <https://doi.org/10.1006/hbeh.2000.1605>
- 398 Burmeister, S.S., Wilczynski, W., 2001. Social context influences androgenic effects on calling  
399 in the Green treefrog (*Hyla cinerea*). *Horm. Behav.* 40, 550–558.  
400 <https://doi.org/10.1006/hbeh.2001.1723>
- 401 Burmeister, S.S., Wilczynski, W., 2005. Social signals regulate gonadotropin-releasing hormone  
402 neurons in the Green treefrog. *Brain. Behav. Evol.* 65, 26–32.  
403 <https://doi.org/10.1159/000081108>
- 404 Cheng, M.F., 1992. For whom does the female dove coo? A case for the role of vocal self-  
405 stimulation. *Anim. Behav.* 43, 1035–1044. [https://doi.org/10.1016/S0003-](https://doi.org/10.1016/S0003-3472(06)80016-3)  
406 [3472\(06\)80016-3](https://doi.org/10.1016/S0003-3472(06)80016-3)
- 407 Cheng, M.F., Peng, J.P., Johnson, P., 1998. Hypothalamic neurons preferentially respond to  
408 female nest coo stimulation: Demonstration of direct acoustic stimulation of luteinizing  
409 hormone release. *J. Neurosci.* 18, 5477–5489. [https://doi.org/10.1523/JNEUROSCI.18-](https://doi.org/10.1523/JNEUROSCI.18-14-05477.1998)  
410 [14-05477.1998](https://doi.org/10.1523/JNEUROSCI.18-14-05477.1998)
- 411  
412 Chu, J., Marler, C.A., Wilczynski, W., 1998. The effects of arginine vasotocin on the calling  
413 behavior of male cricket frogs in changing social contexts. *Horm. Behav.* 34, 248–261.  
414 <https://doi.org/10.1006/hbeh.1998.1479>
- 415 Chu, J., Wilczynski, W., 2001. Social influences on androgen levels in the southern leopard frog,  
416 *Rana sphenoccephala*. *Gen. Comp. Endocrinol.* 121, 66–73.  
417 <https://doi.org/10.1006/gcen.2000.7563>
- 418 Clotfelter, E.D., 1998. What cues do brown-headed cowbirds use to locate red-winged blackbird  
419 host nests? *Anim. Behav.* 55, 1181–1189. <https://doi.org/10.1006/anbe.1997.0638>

- 420 Dellovade, T.L., Rissman, E.F., 1994. Gonadotropin-releasing hormone-immunoreactive cell  
421 numbers change in response to social interactions. *Endocrinology* 134, 2189–2197.  
422 <https://doi.org/10.1210/endo.134.5.8156921>
- 423 Dufty, A.M., Wingfield, J.C., 1986. The influence of social cues on the reproductive  
424 endocrinology of male brown-headed cowbirds: field and laboratory studies. *Horm.*  
425 *Behav.* 20, 222–234.
- 426 Dufty, A.M., Wingfield, J.C., 1990. Endocrine response of captive male Brown-Headed cowbirds  
427 to intrasexual social cues. *Condor* 92, 613–620. <https://doi.org/10.2307/1368681>
- 428 Freeman, S., Gori, D.F., Rohwer, S., 1990. Red-Winged blackbirds and Brown-Headed  
429 cowbirds: Some aspects of a host-parasite relationship. *Condor* 92, 336.  
430 <https://doi.org/10.2307/1368231>
- 431 Friedman, M.B., 1977. Interactions between visual and vocal courtship stimuli in the  
432 neuroendocrine response of female doves. *J. Comp. Physiol.* 91, 1408–1416.  
433
- 434 Gochfeld, M., 1979. Brood parasite and host coevolution: Interactions between Shiny cowbirds  
435 and two species of Meadowlarks. *Am. Nat.* 113, 855–870.
- 436 Haase, E., Paulke, E., Sharp, P.J., 1976. Effects of seasonal and social factors on testicular  
437 activity and hormone levels in domestic pigeons. *J. Exp. Zool.* 197, 81–87.  
438 <https://doi.org/10.1002/jez.1401970109>
- 439 Hann, H. W. 1941. The cowbird at the nest. *Wilson Bull.*, 53, 211–221.
- 440 Janecka, M.J., Brush, T., 2014. Differential response by bronzed cowbirds to songs of potential  
441 hosts in the lower Rio Grande Valley of Texas. *Southwest. Nat.* 59, 556–561.  
442 <https://doi.org/10.1894/EKL-03.1>
- 443 Kroodsma, D.E., 1976. Reproductive development in a female songbird: differential stimulation  
444 by quality of male song. *Science* 192, 574–575.  
445 <https://doi.org/10.1126/science.192.4239.574>
- 446 Lea, J., Dyson, M., Halliday, T., 2001. Calling by male midwife toads stimulates females to  
447 maintain reproductive condition. *Anim. Behav.* 61, 373–377.  
448 <https://doi.org/10.1006/anbe.2000.1604>
- 449 Lehrman, D.S., 1965. Interaction between internal and external environments in the regulation  
450 of the reproductive cycle of the ring dove. *Sex and behavior*, 355.
- 451 Lipkind, D., Nottebohm, F., Rado, R., Barnea, A., 2002. Social change affects the survival of  
452 new neurons in the forebrain of adult songbirds. *Behav. Brain Res.* 133, 31–43.
- 453 Lowther, P. E. (1993). Brown-headed cowbird (*Molothrus ater*). In *The Birds of North America*  
454 (eds. A. Poole, Gill, F.). Ithaca, NY: Cornell Lab of Ornithology.  
455
- 456 Lynch, K.S. and Wilczynski, W., 2005. Gonadal steroids vary with reproductive stage in a  
457 tropically breeding female anuran. *Gen. Comp. Endocrinol.* 143, 51-56.  
458
- 459 Lynch, K.S., Wilczynski, W., 2006. Social regulation of plasma estradiol concentration in a  
460 female anuran. *Horm. Behav.* 50, 101–106. <https://doi.org/10.1016/j.yhbeh.2006.01.010>

- 461 Lynch, K.S., Wilczynski, W., 2008. Reproductive hormones modify reception of species-typical  
462 communication signals in a female anuran. *Brain. Behav. Evol.* 71, 143–150.  
463 <https://doi.org/10.1159/000111460>
- 464 Lynch, K.S., Gaglio, A., Tyler, E., Coculo, J., Louder, M.I.M., Hauber, M.E., 2017. A neural basis  
465 for password-based species recognition in an avian brood parasite. *J. Exp. Biol.* 220,  
466 2345–2353. <https://doi.org/10.1242/jeb.158600>
- 467 Monk, S.G., Brush, T., 2007. Response of brood-parasitic bronzed cowbird to playback of the  
468 song of audubon's oriole. *Southwest. Nat.* 52, 438–441. [https://doi.org/10.1894/0038-4909\(2007\)52\[438:ROBBCT\]2.0.CO;2](https://doi.org/10.1894/0038-4909(2007)52[438:ROBBCT]2.0.CO;2)
- 470 O'loghlen, A.L. and Rothstein, S.I., 2010. It's not just the song: male visual displays enhance  
471 female sexual responses to song in brown-headed cowbirds. *Condor*, 112, 615-621.  
472
- 473 Ortega, C.P. and Cruz, A., 1988. Mechanisms of egg acceptance by marsh-dwelling blackbirds.  
474 *Condor*, 349-358.  
475
- 476 Ortega, C.P., Cruz, A., 1991. A comparative study of cowbird parasitism in Yellow-Headed  
477 blackbirds and Red-Winged blackbirds. *Auk* 108, 16–24.
- 478 Perfito, N., Guardado, D., Williams, T.D., Bentley, G.E., 2015. Social cues regulate reciprocal  
479 switching of hypothalamic Dio2/Dio3 and the transition into final follicle maturation in  
480 European starlings (*Sturnus vulgaris*). *Endocrinology* 156, 694–706.  
481 <https://doi.org/10.1210/en.2014-1450>
- 482 Propper, C.R., Moore, F.L., 1991. Effects of courtship on brain gonadotropin hormone-releasing  
483 hormone and plasma steroid concentrations in a female amphibian (*Taricha granulosa*).  
484 *Gen. Comp. Endocrinol.* 81, 304–312.
- 485 Roleira, A., Oliveira, G.A., Lopes, J.S., Oliveira, R.F., 2017. Audience effects in territorial  
486 defense of male cichlid fish are associated with differential patterns of activation of the  
487 brain social decision-making network. *Front. Behav. Neurosci.* 11, 105.  
488 <https://doi.org/10.3389/fnbeh.2017.00105>
- 489 Page, R.A. and Ryan, M.J., 2008. The effect of signal complexity on localization performance in  
490 bats that localize frog calls. *Anim. Behav.* 76, 761-769.
- 491 Waas, J.R., Colgan, P.W., Boag, P.T., 2005. Playback of colony sound alters the breeding  
492 schedule and clutch size in zebra finch (*Taeniopygia guttata*) colonies. *Proc. Biol. Sci.*  
493 272, 383–388. <https://doi.org/10.1098/rspb.2004.2949>
- 494 Watts, H.E., Edley, B., Hahn, T.P., 2016. A potential mate influences reproductive development  
495 in female, but not male, pine siskins. *Horm. Behav.* 80, 39–46.  
496 <https://doi.org/10.1016/j.yhbeh.2016.01.006>
- 497 Wiley, J.W., 1988. Host Selection by the Shiny Cowbird. *Condor* 90, 289–303.  
498 <https://doi.org/10.2307/1368557>
- 499 Wingfield, J.C., Hahn, T.P., Wada, M., Schoech, S.J., 1997. Effects of day length and  
500 temperature on gonadal development, body mass, and fat depots in white-crowned

501 sparrows, *Zonotrichia leucophrys pugetensis*. Gen. Comp. Endocrinol. 107, 44–62.  
502 <https://doi.org/10.1006/gcen.1997.6894>

503 Zuk, M., Kolluru, G.R., 1998. Exploitation of sexual signals by predators and parasitoids. Q.  
504 Rev. Biol. 73, 415–438.

505

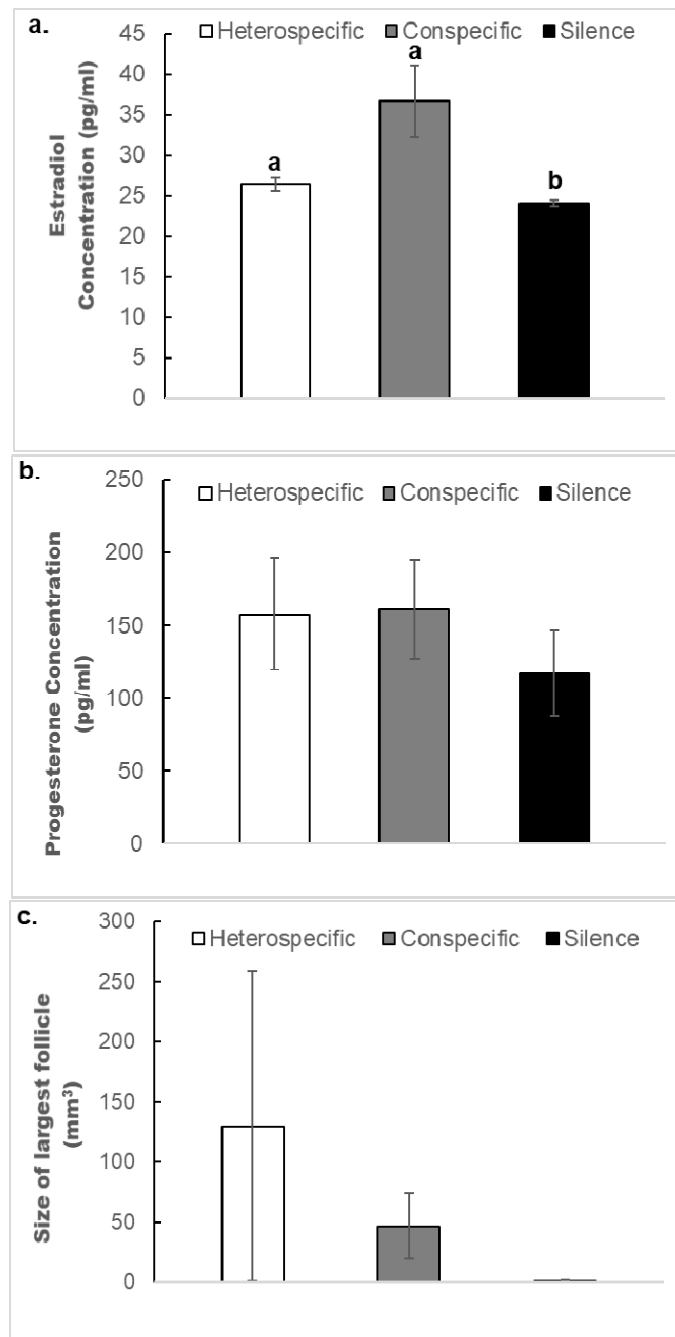

Source: https://www.biorxiv.org/content/10.1101/366799v1.full.pdf
